# Supplementary material for: A simple approach for superior performance of lithium/sulphur batteries modified with a gel polymer electrolyte
Source: Royal Society of Chemistry journal article supplement (doi:10.1039/c4ta00597j), 2014-01-01
Supplement: c4ta00597j1.pdf [file c4ta00597j1.pdf]

Supporting Information for

**A simple approach for superior performance of lithium/sulfur  
batteries modified with gel polymer electrolyte**

Sheng S. Zhang\*, Dat T. Tran

Electrochemistry Branch, RDRL-SED-C, Sensors and Electron Devices Directorate,  
U.S. Army Research Laboratory, Adelphi, MD 20783-1197, USA

**Supplemental Figures and notes**

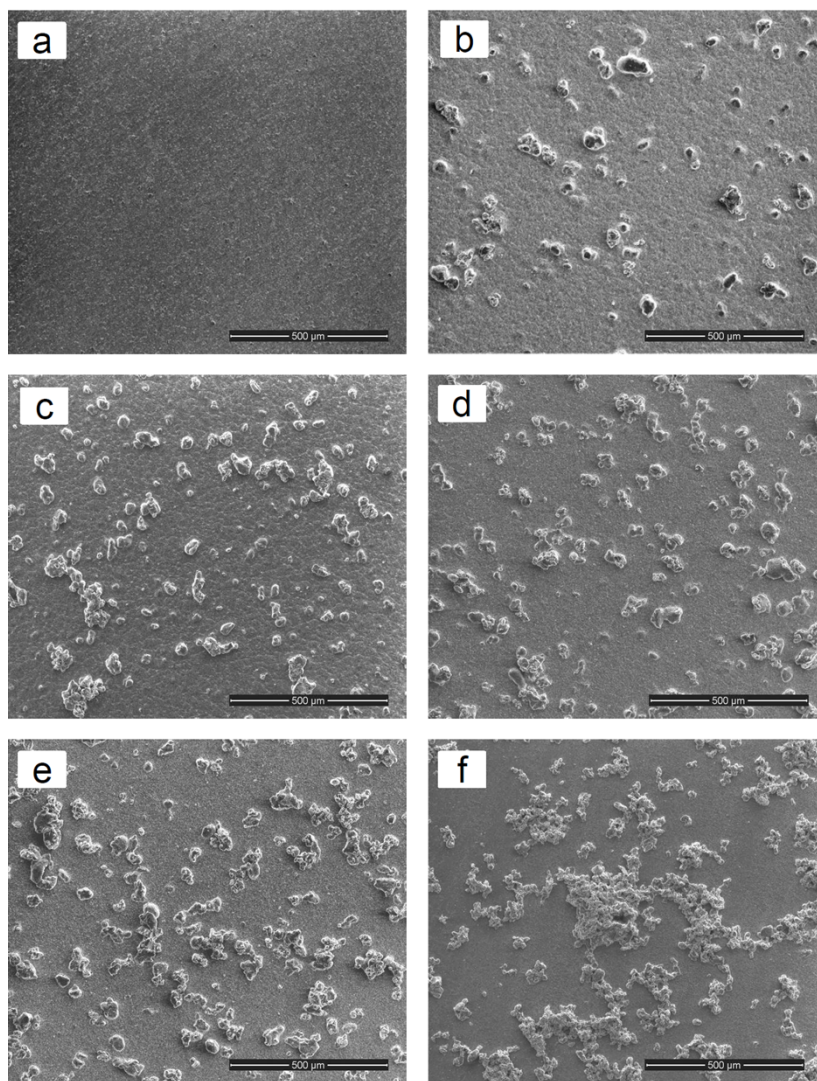

**Figure S1.** SEM image of (100-x)PEO-xS coated separators. (a) x=0, (b) x=20, (c) x=30, (d) x=40, (e) x=50, and (f) x=60. All scale bars are 500  $\mu\text{m}$ .

---

\* Corresponding author: Tel: +1-301-394-0981; Fax: +1-301 394-0273.

*E-mail address:* [shengshui.zhang.civ@mail.mil](mailto:shengshui.zhang.civ@mail.mil) or [shengshui@gmail.com](mailto:shengshui@gmail.com) (S.S. Zhang)

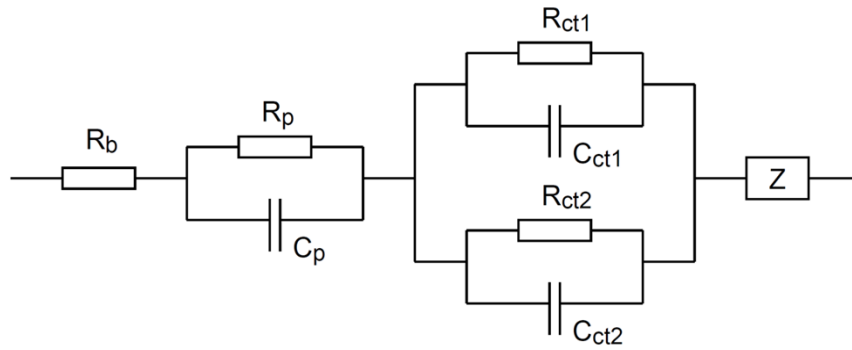

**Figure S2.** Equivalent circuit used for fitting of EIS.

The EIS was fitted using an equivalent circuit shown in Figure S2, in which  $R_b$  is the overall resistance of electrolyte-wetted separator and cell hardware,  $R_p$  and  $C_p$  are the resistance and capacitance of passivation layer, or called solid electrolyte interface (SEI), on the surface of lithium,  $R_{ct1}/C_{ct1}$  and  $R_{ct2}/C_{ct2}$  are the resistance and capacitance of charge-transfer process for lithium and sulfur, respectively, on the electrolyte-lithium interface, and  $Z$  is Warburg impedance reflecting the semi-infinite linear diffusion of  $\text{Li}^+$  ions. The  $R_{ct1}/C_{ct1}$  and  $R_{ct2}/C_{ct2}$  correspond to the following two electrochemical processes, respectively [1].

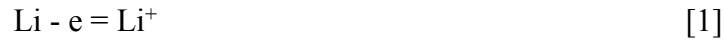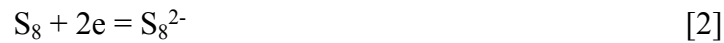

For Li/P-separator/Li cell in the absence of sulfur,  $R_{ct2}/C_{ct2}$  are taken as the infinity. In this case the EIS consists of two overlapped semicircles (see Fig. 3a in article). In Li/SC-separator/Li cell, eq. 1 and eq. 2 undergo simultaneously and contribute to impedance. Since the  $R_{ct1}/C_{ct1}$  and  $R_{ct2}/C_{ct2}$  are in the similar response time range, their semicircles are merged into a semicircle that is further overlapped with the  $R_p/C_p$  semicircle. As a result, the Li/SC-separator/Li cell shows only a broad semicircle (see Fig. 3b in article). The  $R_p$  of Li/SC-separator/Li cell was fitted using the same frequency range as obtained from the Li/P-separator/Li cell.

#### Reference

- 1 S.S. Zhang, *Electrochim. Acta*, 2012, **70**, 344.
